# Supplementary material
Source: PubMed Central journal article supplement (PMC6064609)
Supplement: NIHMS972597-supplement-1.pdf [file NIHMS972597-supplement-1.pdf]

**Supplemental Table 1: Characteristics of study participants**

| Subject           | ART | Gender          | Ethnicity       | Age (years)        | Viral Load (copies/mL) | CD4 T cells/mm <sup>3</sup> |
|-------------------|-----|-----------------|-----------------|--------------------|------------------------|-----------------------------|
| S1                | NO  | M               | W               | 47                 | 79200                  | 773                         |
| S2                | NO  | M               | W               | 48                 | 256                    | 422                         |
| S3                | NO  | F               | B               | 43                 | 2170                   | 798                         |
| S4                | NO  | M               | W               | 38                 | 288000                 | 387                         |
| S5                | NO  | M               | W               | 42                 | 65500                  | 612                         |
| S6                | NO  | M               | W               | 32                 | 11200                  | 672                         |
| S7                | NO  | M               | W               | 37                 | 15200                  | 934                         |
| S8                | NO  | F               | B               | 59                 | <50                    | 1283                        |
| S9                | NO  | M               | W               | 49                 | 9590                   | 651                         |
| S10               | NO  | M               | W               | 38                 | 4800                   | 641                         |
| S11               | NO  | M               | B               | 62                 | 4037                   | 565                         |
| S12               | NO  | M               | W               | 51                 | 5780                   | 700                         |
| S13               | NO  | M               | B               | 51                 | 5650                   | 565                         |
| S14               | NO  | F               | B               | 59                 | <50                    | 1283                        |
| S15               | NO  | M               | W               | 45                 | 8960                   | 1108                        |
| S16               | NO  | M               | W               | 50                 | 15001                  | 372                         |
| S17               | NO  | M               | W               | 52                 | 177                    | 436                         |
| S18               | NO  | M               | W               | 55                 | 92                     | 766                         |
| S19               | NO  | F               | W               | 49                 | 517                    | 420                         |
| S20               | NO  | M               | W               | 50                 | 2259                   | 675                         |
| S21               | NO  | M               | B               | 59                 | 126                    | 1371                        |
| S22               | NO  | M               | W               | 26                 | 2700                   | 597                         |
| S23               | NO  | F               | B               | 23                 | 7095                   | 172                         |
| S24               | NO  | M               | B               | 47                 | 39489                  | 492                         |
| S25               | NO  | M               | W               | 43                 | 193437                 | 356                         |
| S26               | NO  | M               | W               | 48                 | 15250                  | 416                         |
| S27               | NO  | M               | W               | 42                 | 105130                 | 320                         |
| S28               | NO  | M               | B               | 23                 | 13438                  | 234                         |
| S29               | NO  | M               | B               | 34                 | 1000000                | 300                         |
| Column Statistics |     | Total: 29       | Total: 29       | Median: 47         | Median: 7095           | Median: 597                 |
|                   |     | Male: 24 (83%)  | White: 19 (66%) | Lower quartile: 38 | Lower quartile: 1344   | Lower quartile: 401.5       |
|                   |     | Female: 5 (17%) | Black: 10 (34%) | Upper quartile: 41 | Upper quartile: 27370  | Upper quartile: 769.5       |

| Subject           | ART | Gender          | Ethnicity       | Age (years)         | Viral Load (copies/mL) | CD4 T cells/mm <sup>3</sup> |
|-------------------|-----|-----------------|-----------------|---------------------|------------------------|-----------------------------|
| S30               | YES | M               | W               | 52                  | <50                    | 271                         |
| S31               | YES | M               | W               | 50                  | <50                    | 700                         |
| S32               | YES | F               | B               | 37                  | <50                    | 416                         |
| S33               | YES | M               | B               | 26                  | <50                    | 862                         |
| S34               | YES | M               | W               | 55                  | <50                    | 465                         |
| S35               | YES | M               | W               | 55                  | <50                    | 372                         |
| Column Statistics |     | Total: 6        | Total: 6        | Median: 51          | Median: <50            | Median: 440.5               |
|                   |     | Male:5 (83%)    | White : 4 (67%) | Lower quartile: 34  | Lower quartile: <50    | Lower quartile: 346.8       |
|                   |     | Female :1 (17%) | Black: 2 (33%)  | Upper quartile : 55 | Upper quartile : <50   | Upper quartile : 740.5      |
